# Supplementary material
Source: MDPI journal article supplement (https://www.mdpi.com/2504-477X/7/3/116)
Supplement: s1 [file s1]

## Supplementary Information

### Closed Loop Composite Welding and Bonding System Using Radio-frequency Heating and Pressure

Ian Enriquez<sup>1</sup>, Colin Noronha<sup>1</sup>, Katrina Teo<sup>1</sup>, Anubhav Sarmah<sup>2</sup>, Surabhit Gupta<sup>3</sup>, Ankush Nandi<sup>1</sup>, Blake Fishbeck<sup>2</sup>, Micah J. Green<sup>2</sup>, Aniruddh Vashisth<sup>1\*</sup>

<sup>1</sup> Department of Mechanical Engineering, University of Washington, Seattle, WA, USA

<sup>2</sup> Artie McFerrin Department of Chemical Engineering, Texas A&M University, College Station, TX, USA

<sup>3</sup> Department of Mechanical Engineering, Indian Institute of Technology - Banaras Hindu University, Varanasi, UP, India

\* Corresponding Author (vashisth@uw.edu)

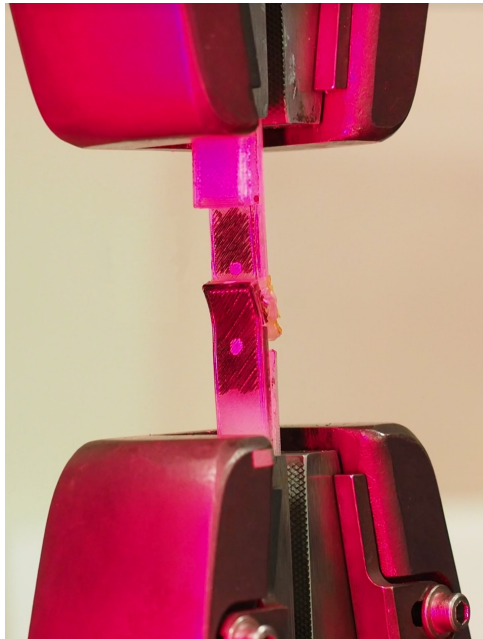

**Figure S1.** Laps hear testing of welded specimens using servo-hydraulic testing machine.

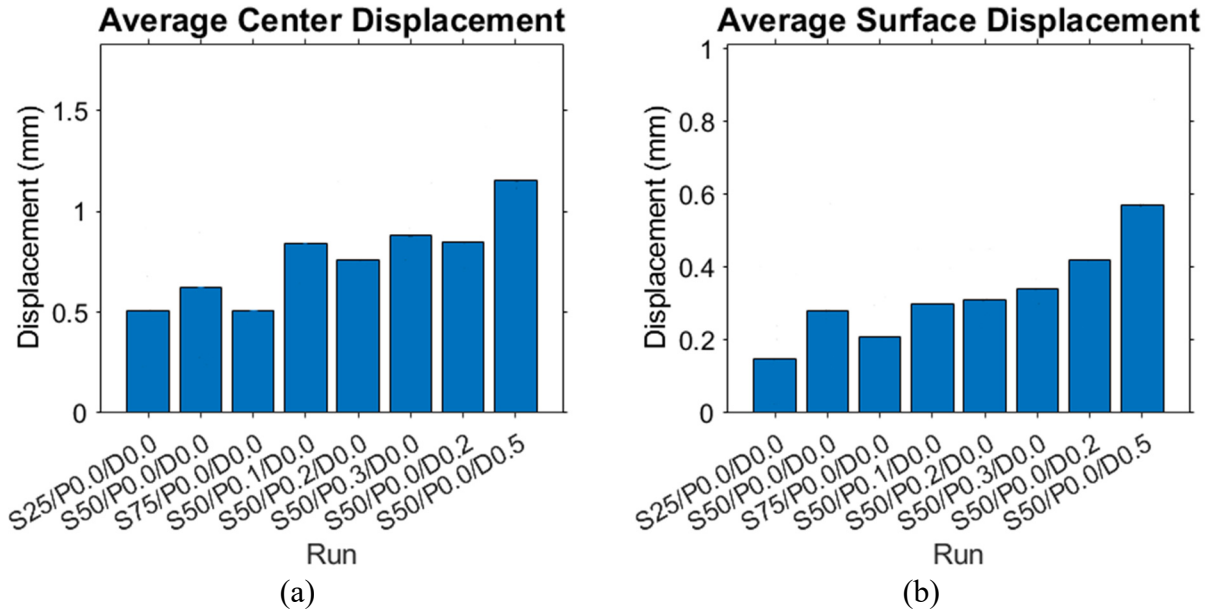

**Figure S2.** Average displacement of (a) center bondline and (b) top surface measured after RF welding for defined welding parameters.

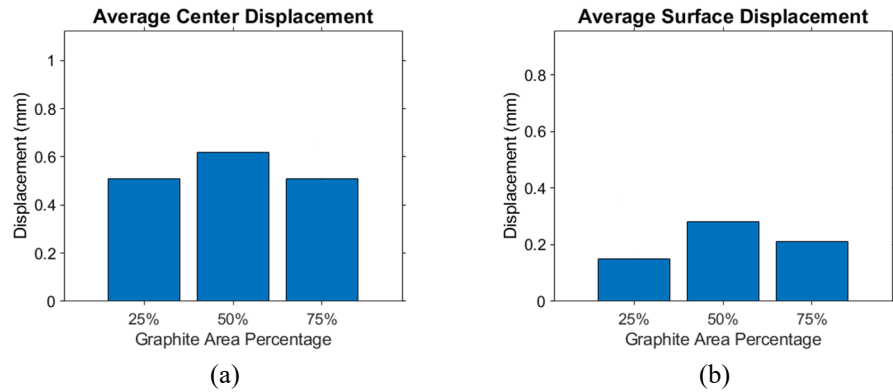

**Figure S3.** Center and surface displacement for specific displacement values varying with the graphite density.

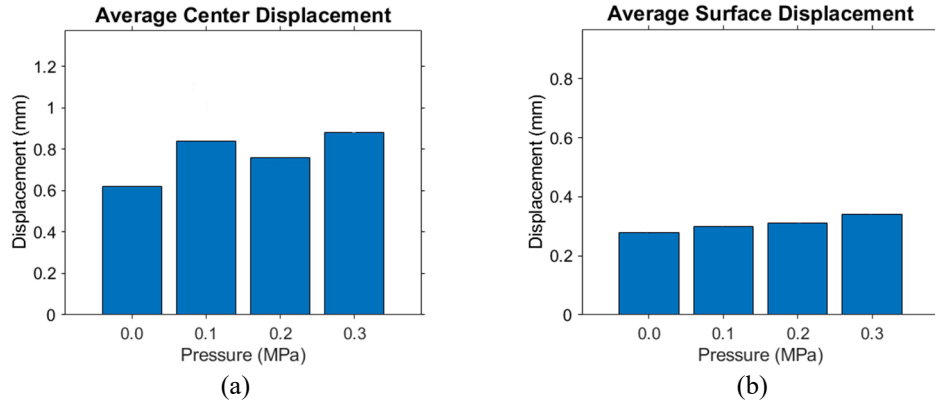

**Figure S4.** Center and surface displacement for different values of applied pressure.

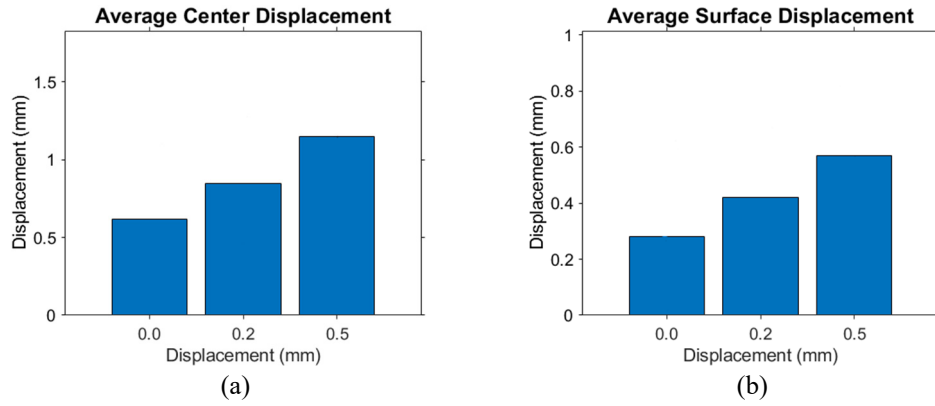

**Figure S5.** Center and surface displacement for different values of applied displacement.
